# Supplementary material for: Pan-cancer analysis identifies olfactory receptor family 7 subfamily A member 5 as a potential biomarker for glioma
Source: PeerJ journal article supplement (doi:10.7717/peerj.17631), 2024-07-10
Supplement: Figure11rawdata.xlsx [file Figure11rawdata.xlsx]

## Sheet: Sheet1
Figure 10A
U87	si-Con			si-OR7A5#1			si-OR7A5#2			si-OR7A5#3
OR7A5	13964.6	12401.9	12481.6	10158.4	10222.2	10927.8	6556.66	7014.07	6615.66	8767.02	8659.02	8836.73
β-actin	7492.66	7293.95	7220.95	5860.76	6177	6161.71	3667.45	4120.69	4010.76	6429.88	6404.12	6546
OR7A5/β-actin	1.86377	1.7003	1.72852	1.7333	1.65487	1.77349	1.7878	1.70216	1.64948	1.36348	1.3521	1.34994
U251	si-Con			si-OR7A5#1			si-OR7A5#2			si-OR7A5#3
OR7A5	12587.6	12259.1	12170.8	9559.15	8825.37	8731.9	7320.37	6504.47	6256.4	5474.88	5466.88	5233.05
βactin	9439.15	9242.9	8578.83	8725.78	8988.61	8445.37	8495.2	8511.2	8153.2	8764.61	8662.2	7973
OR7A5/βactin	1.33356	1.32633	1.4187	1.09551	0.981839	1.03393	0.861707	0.764225	0.767355	0.624658	0.63112	0.656347
Figure 10B,C
	24h	48h	72h	96h			24h	48h	72h	96h
U87-si-Con	0.367	0.638	0.991	1.363		U251-si-Con	0.248	0.498	0.672	0.865
	0.362	0.721	0.972	1.432			0.237	0.572	0.751	0.992
	0.336	0.669	0.985	1.479			0.233	0.481	0.688	0.875
	0.325	0.621	0.832	1.232			0.225	0.477	0.663	0.881
U87-si-OR7A5#3	0.388	0.522	0.662	0.854		U251-si-OR7A5#3	0.231	0.308	0.522	0.511
	0.351	0.448	0.531	0.773			0.245	0.379	0.471	0.548
	0.369	0.545	0.677	0.916			0.237	0.382	0.428	0.577
	0.382	0.562	0.685	0.843			0.224	0.433	0.485	0.632
Figure 10D
U87-si-Con	489	572	634
U87-si-OR7A5#3	302	273	216
U251-si-Con	625	738	812
U251-si-OR7A5#3	446	403	539
Figure 10E
U87	si-Con			si-OR7A5#3				U251	si-Con			si-OR7A5#3
EdU	274	255	261	133	156	129		EdU	82	88	105	42	52	56
DAPI	815	842	803	788	812	802		DAPI	274	305	327	240	288	294
radio	0.336196	0.30285	0.325031	0.168782	0.192118	0.160848		radio	0.29927	0.288525	0.321101	0.175	0.180556	0.190476
%	0.336196	0.30285	0.325031	0.168782	0.192118	0.160848		%	0.29927	0.288525	0.321101	0.175	0.180556	0.190476
