# Supplementary material for: Pan-cancer analysis identifies olfactory receptor family 7 subfamily A member 5 as a potential biomarker for glioma
Source: PeerJ journal article supplement (doi:10.7717/peerj.17631), 2024-07-10
Supplement: Figure12rawdata.xlsx [file Figure12rawdata.xlsx]

## Sheet: Sheet1
Figure 11E
U87-si-Con	0.753	0.669	0.871
U87-si-OR7A5#3	0.323	0.294	0.369
Figure 11F
U251-si-Con	0.624	0.659	0.718
U251-si-OR7A5#3	0.367	0.485	0.331
Figure 11G
U87-si-Con	0.792	0.836	0.847
U87-si-OR7A5#3	0.513	0.597	0.472
Figure 11H
U251-si-Con	0.804	0.788	0.621
U251-si-OR7A5#3	0.387	0.452	0.303
Figure 11I
U87	si-Con			si-OR7A5#3
FASN	8178.2	9042.22	8715.27	3323.5	3857.28	3787.57
GAPDH	13787.4	13538.6	13436.6	16474.2	16791.1	18730.2
FASN/GADPH	0.593164	0.667885	0.648622	0.20174	0.229721	0.202217
U251	si-Con			si-OR7A5#3
FASN	7692.54	8263.32	8224.61	4058.69	3979.69	4336.64
GAPDH	10635.6	11031.8	10855.4	12456.2	12207	11987.9
FASN/GADPH	0.723285	0.749045	0.757652	0.325838	0.326016	0.361751
U87	si-Con			si-OR7A5#3
SREBP1	9660.27	9468.85	9771.09	3091.45	3159.45	3210.86
GAPDH	19396.6	19281.3	19446	23073.8	22115.7	22872.6
SREBP1/GADPH	0.498039	0.49109	0.502473	0.133981	0.14286	0.140381
U251	si-Con			si-OR7A5#3
SREBP1	7637.66	7723.66	7560.25	2751.91	2874.62	2934.03
GAPDH	12463.1	12259.7	12356	12422.5	12305.1	12188
SREBP1/GADPH	0.612822	0.630005	0.61187	0.221526	0.233612	0.240732
